# Supplementary material
Source: PubMed Central journal article supplement (PMC5998918)
Supplement: ba019125-suppl1.pdf [file ba019125-suppl1.pdf]

**Supplementary Figure 1. Kaplan-Meier curves demonstrating overall survival of patients based on the use of chemotherapy.** Patients who did not receive chemotherapy had a poorer one-year (9.0%, 95% CI 8.5%-9.4%) and five-year overall survival (2.6%, 95% CI 2.3%-2.9%), as compared to patients treated with chemotherapy (49.9%, 95% CI 49.4%-50.3% at one year, and 25.8%, 95% CI 25.4%-26.3% at five years). CI indicates confidence interval.

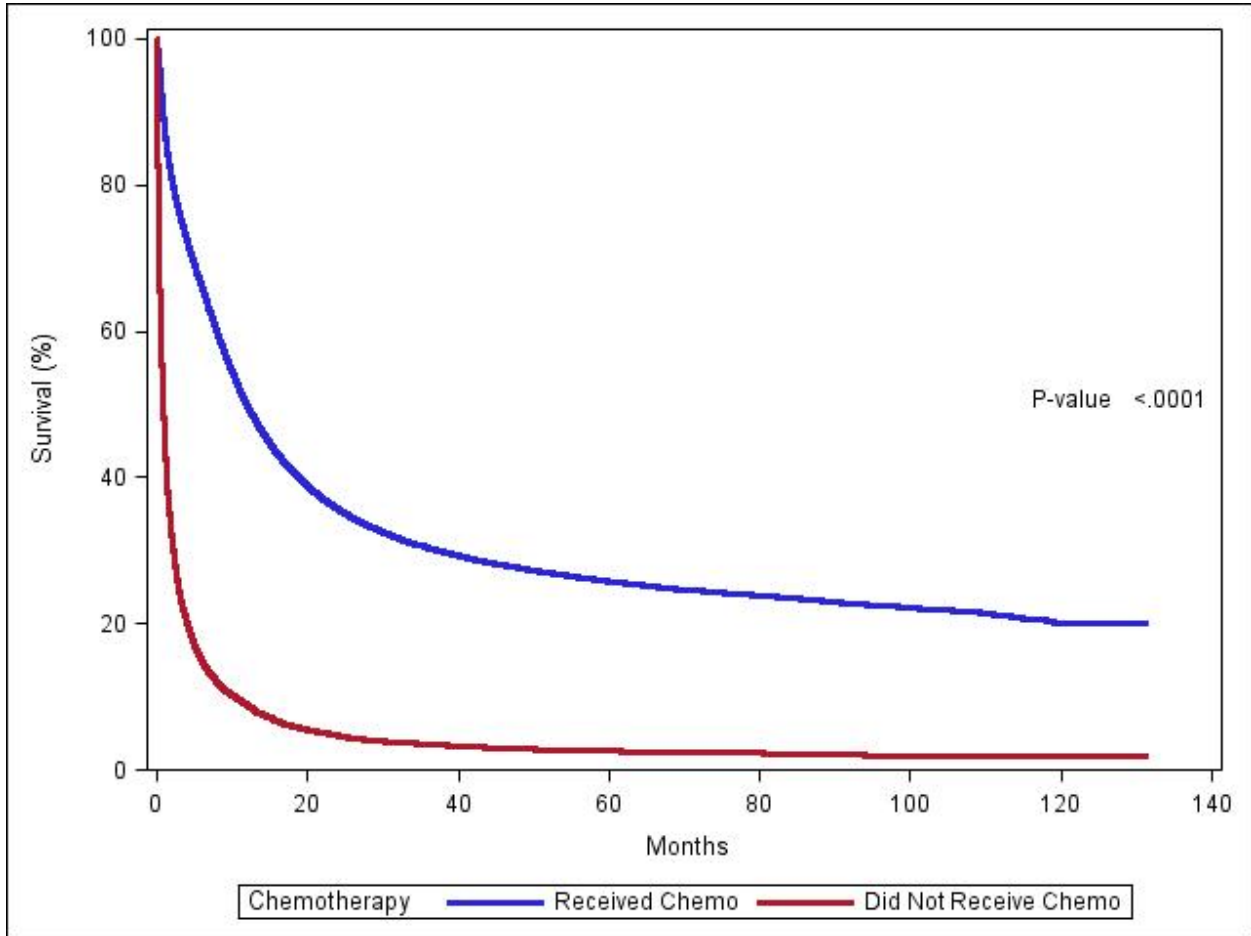

**Supplementary table 1. Age by insurance status interaction predicting receipt of chemotherapy**

| <b>Age by insurance status interaction</b> | <b>Odds ratio (95% confidence interval)</b> |
|--------------------------------------------|---------------------------------------------|
| 18-40 years old                            |                                             |
| Not insured vs Private Insurance           | 0.484 (0.366, 0.640)                        |
| Not insured vs Medicaid                    | 0.395 (0.283, 0.551)                        |
| Not insured vs Medicare                    | 0.791 (0.476, 1.313)                        |
| Not insured vs Other Government            | 0.767 (0.354, 1.666)                        |
| Medicaid vs Private Insurance              | 1.227 (0.938, 1.604)                        |
| Medicare vs Private Insurance              | 0.612 (0.384, 0.976)                        |
| Other Government vs Private Insurance      | 0.631 (0.298, 1.334)                        |
| Medicaid vs Medicare                       | 2.004 (1.213, 3.310)                        |
| Medicaid vs Other Government               | 1.945 (0.899, 4.207)                        |
| Medicare vs Other Government               | 0.971 (0.410, 2.296)                        |
| 41-59 years old                            |                                             |
| Not insured vs Private Insurance           | 0.523 (0.426, 0.641)                        |
| Not insured vs Medicaid                    | 0.674 (0.525, 0.865)                        |
| Not insured vs Medicare                    | 1.370 (1.077, 1.741)                        |
| Not insured vs Other Government            | 0.544 (0.303, 0.974)                        |
| Medicaid vs Private Insurance              | 0.776 (0.645, 0.934)                        |
| Medicare vs Private Insurance              | 0.382 (0.322, 0.453)                        |
| Other Government vs Private Insurance      | 0.962 (0.550, 1.680)                        |
| Medicaid vs Medicare                       | 2.033 (1.626, 2.543)                        |
| Medicaid vs Other Government               | 0.807 (0.453, 1.437)                        |
| Medicare vs Other Government               | 0.397 (0.224, 0.703)                        |
| 60-70 years old                            |                                             |
| Not insured vs Private Insurance           | 0.573 (0.441, 0.746)                        |
| Not insured vs Medicaid                    | 0.789 (0.569, 1.093)                        |
| Not insured vs Medicare                    | 0.919 (0.712, 1.188)                        |
| Not insured vs Other Government            | 0.680 (0.417, 1.109)                        |
| Medicaid vs Private Insurance              | 0.726 (0.578, 0.913)                        |
| Medicare vs Private Insurance              | 0.623 (0.562, 0.692)                        |
| Other Government vs Private Insurance      | 0.843 (0.548, 1.297)                        |
| Medicaid vs Medicare                       | 1.165 (0.934, 1.453)                        |
| Medicaid vs Other Government               | 0.861 (0.537, 1.382)                        |
| Medicare vs Other Government               | 0.739 (0.483, 1.132)                        |
| 71-80 years old                            |                                             |

|                                       |                        |
|---------------------------------------|------------------------|
| Not insured vs Private Insurance      | 0.794 (0.500, 1.260)   |
| Not insured vs Medicaid               | 0.804 (0.465, 1.389)   |
| Not insured vs Medicare               | 0.797 (0.508, 1.250)   |
| Not insured vs Other Government       | 1.067 (0.553, 2.058)   |
| Medicaid vs Private Insurance         | 0.988 (0.707, 1.380)   |
| Medicare vs Private Insurance         | 0.996 (0.885, 1.121)   |
| Other Government vs Private Insurance | 0.744 (0.455, 1.218)   |
| Medicaid vs Medicare                  | 0.992 (0.722, 1.363)   |
| Medicaid vs Other Government          | 1.327 (0.748, 2.357)   |
| Medicare vs Other Government          | 1.339 (0.827, 2.167)   |
| >80 years old                         |                        |
| Not insured vs Private Insurance      | 0.814 (0.410, 1.618)   |
| Not insured vs Medicaid               | 0.740 (0.324, 1.687)   |
| Not insured vs Medicare               | 0.808 (0.413, 1.580)   |
| Not insured vs Other Government       | 0.527 (0.195, 1.423)   |
| Medicaid vs Private Insurance         | 1.101 (0.664, 1.827)   |
| Medicare vs Private Insurance         | 1.008 (0.856, 1.186)   |
| Other Government vs Private Insurance | 1.546 (0.729, 3.276)   |
| Medicaid vs Medicare                  | 1.093 (0.673, 1.774)   |
| Medicaid vs Other Government          | 0.712 (0.296, 1.715)   |
| Medicare vs Other Government          | 0.652 (0.312, 1.361)   |
|                                       |                        |
| Not Insured                           |                        |
| 18-40 vs 41-59                        | 0.884 (0.623, 1.255)   |
| 18-40 vs 60-70                        | 1.481 (1.010, 2.173)   |
| 18-40 vs 71-80                        | 3.614 (2.117, 6.171)   |
| 18-40 vs >80                          | 10.710 (5.158, 22.238) |
| 41-59 vs 60-70                        | 1.675 (1.220, 2.300)   |
| 41-59 vs 71-80                        | 4.087 (2.505, 6.668)   |
| 41-59 vs >80                          | 12.110 (6.025, 24.343) |
| 60-70 vs 71-80                        | 2.440 (1.460, 4.076)   |
| 60-70 vs >80                          | 7.229 (3.537, 14.776)  |
| 71-80 vs >80                          | 2.963 (1.324, 6.632)   |
| Private Insurance                     |                        |
| 18-40 vs 41-59                        | 0.955 (0.751, 1.215)   |
| 18-40 vs 60-70                        | 1.754 (1.384, 2.224)   |
| 18-40 vs 71-80                        | 5.929 (4.630, 7.591)   |

|                         |                         |
|-------------------------|-------------------------|
| 18-40 vs >80            | 18.023 (13.740, 23.640) |
| 41-59 vs 60-70          | 1.837 (1.599, 2.110)    |
| 41-59 vs 71-80          | 6.208 (5.319, 7.245)    |
| 41-59 vs >80            | 18.871 (15.595, 22.835) |
| 60-70 vs 71-80          | 3.380 (2.916, 3.917)    |
| 60-70 vs >80            | 10.274 (8.539, 12.362)  |
| 71-80 vs >80            | 3.040 (2.501, 3.696)    |
| <b>Medicaid</b>         |                         |
| 18-40 vs 41-59          | 1.510 (1.081, 2.108)    |
| 18-40 vs 60-70          | 2.963 (2.076, 4.229)    |
| 18-40 vs 71-80          | 7.362 (4.810, 11.268)   |
| 18-40 vs >80            | 20.075 (11.457, 35.175) |
| 41-59 vs 60-70          | 1.962 (1.490, 2.584)    |
| 41-59 vs 71-80          | 4.877 (3.400, 6.996)    |
| 41-59 vs >80            | 13.298 (7.956, 22.226)  |
| 60-70 vs 71-80          | 2.485 (1.699, 3.636)    |
| 60-70 vs >80            | 6.776 (3.998, 11.486)   |
| 71-80 vs >80            | 2.727 (1.533, 4.851)    |
| <b>Medicare</b>         |                         |
| 18-40 vs 41-59          | 1.532 (0.942, 2.490)    |
| 18-40 vs 60-70          | 1.723 (1.080, 2.746)    |
| 18-40 vs 71-80          | 3.644 (2.291, 5.796)    |
| 18-40 vs >80            | 10.949 (6.872, 17.446)  |
| 41-59 vs 60-70          | 1.124 (0.951, 1.330)    |
| 41-59 vs 71-80          | 2.378 (2.025, 2.794)    |
| 41-59 vs >80            | 7.147 (6.058, 8.433)    |
| 60-70 vs 71-80          | 2.115 (1.948, 2.297)    |
| 60-70 vs >80            | 6.356 (5.806, 6.959)    |
| 71-80 vs >80            | 3.005 (2.788, 3.239)    |
| <b>Other Government</b> |                         |
| 18-40 vs 41-59          | 0.626 (0.246, 1.597)    |
| 18-40 vs 60-70          | 1.312 (0.552, 3.117)    |
| 18-40 vs 71-80          | 5.025 (2.053, 12.297)   |
| 18-40 vs >80            | 7.353 (2.563, 21.095)   |
| 41-59 vs 60-70          | 2.095 (1.044, 4.202)    |
| 41-59 vs 71-80          | 8.023 (3.854, 16.702)   |

|                |                        |
|----------------|------------------------|
| 41-59 vs >80   | 11.739 (4.677, 29.463) |
| 60-70 vs 71-80 | 3.830 (2.020, 7.265)   |
| 60-70 vs >80   | 5.605 (2.401, 13.083)  |
| 71-80 vs >80   | 1.463 (0.608, 3.519)   |

**Supplementary table 2. Age by Charlson comorbidity Score interaction predicting receipt of chemotherapy**

| <b>Age by Charlson comorbidity Score interaction</b>                                                                                                                                                                    | <b>Odds ratio (95% confidence interval)</b>                                                                                                                                                                                                                     |
|-------------------------------------------------------------------------------------------------------------------------------------------------------------------------------------------------------------------------|-----------------------------------------------------------------------------------------------------------------------------------------------------------------------------------------------------------------------------------------------------------------|
| 18-40 years old<br>1 vs 0<br>≥2 vs 0<br>1 vs ≥2                                                                                                                                                                         | 0.404 (0.309, 0.528)<br>0.394 (0.232, 0.670)<br>1.025 (0.580, 1.812)                                                                                                                                                                                            |
| 41-59 years old<br>1 vs 0<br>≥2 vs 0<br>1 vs ≥2                                                                                                                                                                         | 0.786 (0.671, 0.919)<br>0.491 (0.397, 0.608)<br>1.600 (1.255, 2.039)                                                                                                                                                                                            |
| 60-70 years old<br>1 vs 0<br>≥2 vs 0<br>1 vs ≥2                                                                                                                                                                         | 0.861 (0.768, 0.966)<br>0.488 (0.423, 0.562)<br>1.766 (1.502, 2.077)                                                                                                                                                                                            |
| 71-80 years old<br>1 vs 0<br>≥2 vs 0<br>1 vs ≥2                                                                                                                                                                         | 0.833 (0.764, 0.908)<br>0.589 (0.527, 0.659)<br>1.413 (1.246, 1.602)                                                                                                                                                                                            |
| >80 years old<br>1 vs 0<br>≥2 vs 0<br>1 vs ≥2                                                                                                                                                                           | 0.869 (0.782, 0.966)<br>0.732 (0.634, 0.846)<br>1.187 (1.011, 1.394)                                                                                                                                                                                            |
| Charlson comorbidity Score of 0<br>18-40 vs 41-59<br>18-40 vs 60-70<br>18-40 vs 71-80<br>18-40 vs >80<br><br>41-59 vs 60-70<br>41-59 vs 71-80<br>41-59 vs >80<br><br>60-70 vs 71-80<br>60-70 vs >80<br><br>71-80 vs >80 | 1.398 (1.105, 1.769)<br>2.446 (1.952, 3.066)<br>7.162 (5.599, 9.162)<br>19.918 (14.762, 26.875)<br><br>1.749 (1.470, 2.082)<br>5.122 (4.194, 6.255)<br>14.245 (10.955, 18.523)<br><br>2.928 (2.427, 3.533)<br>8.143 (6.320, 10.491)<br><br>2.781 (2.121, 3.647) |
| Charlson comorbidity Score of 1<br>18-40 vs 41-59<br>18-40 vs 60-70<br>18-40 vs 71-80<br>18-40 vs >80<br><br>41-59 vs 60-70<br>41-59 vs 71-80<br>41-59 vs >80                                                           | 0.719 (0.513, 1.010)<br>1.148 (0.833, 1.582)<br>3.476 (2.495, 4.843)<br>9.265 (6.374, 13.468)<br><br>1.596 (1.273, 1.999)<br>4.832 (3.800, 6.145)<br>12.880 (9.580, 17.318)                                                                                     |

|                                                          |                        |
|----------------------------------------------------------|------------------------|
| 60-70 vs 71-80                                           | 3.029 (2.447, 3.748)   |
| 60-70 vs >80                                             | 8.073 (6.136, 10.621)  |
| 71-80 vs >80                                             | 2.666 (2.002, 3.549)   |
| <b>Charlson comorbidity Score of <math>\geq 2</math></b> |                        |
| 18-40 vs 41-59                                           | 1.122 (0.630, 2.000)   |
| 18-40 vs 60-70                                           | 1.977 (1.133, 3.451)   |
| 18-40 vs 71-80                                           | 4.789 (2.732, 8.396)   |
| 18-40 vs >80                                             | 10.724 (5.941, 19.358) |
| 41-59 vs 60-70                                           | 1.762 (1.336, 2.323)   |
| 41-59 vs 71-80                                           | 4.268 (3.210, 5.676)   |
| 41-59 vs >80                                             | 9.557 (6.810, 13.412)  |
| 60-70 vs 71-80                                           | 2.423 (1.907, 3.077)   |
| 60-70 vs >80                                             | 5.425 (4.013, 7.332)   |
| 71-80 vs >80                                             | 2.239 (1.645, 3.049)   |
